# Supplementary material for: Three auditory brainstem response (ABR) methods tested and compared in two anuran species
Source: Oxford University Press journal article supplement (doi:10.1242/jeb.237313), 2020-01-01
Supplement: jeb237313supp.pdf [file jeb237313supp.pdf]

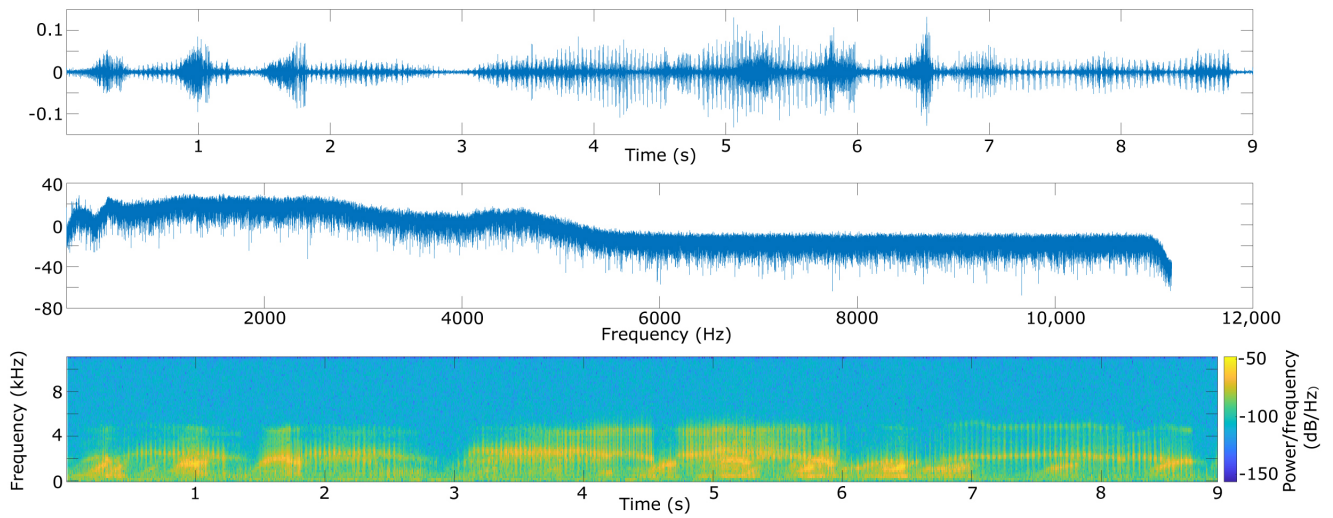

Fig. S1: **Oscillogram, frequency spectrum, and spectrogram of a field recording of calling Green frogs (*P. esculentus*).** Spectrogram settings: FFT size 128, overlap 98%, 128 points Hamming window.

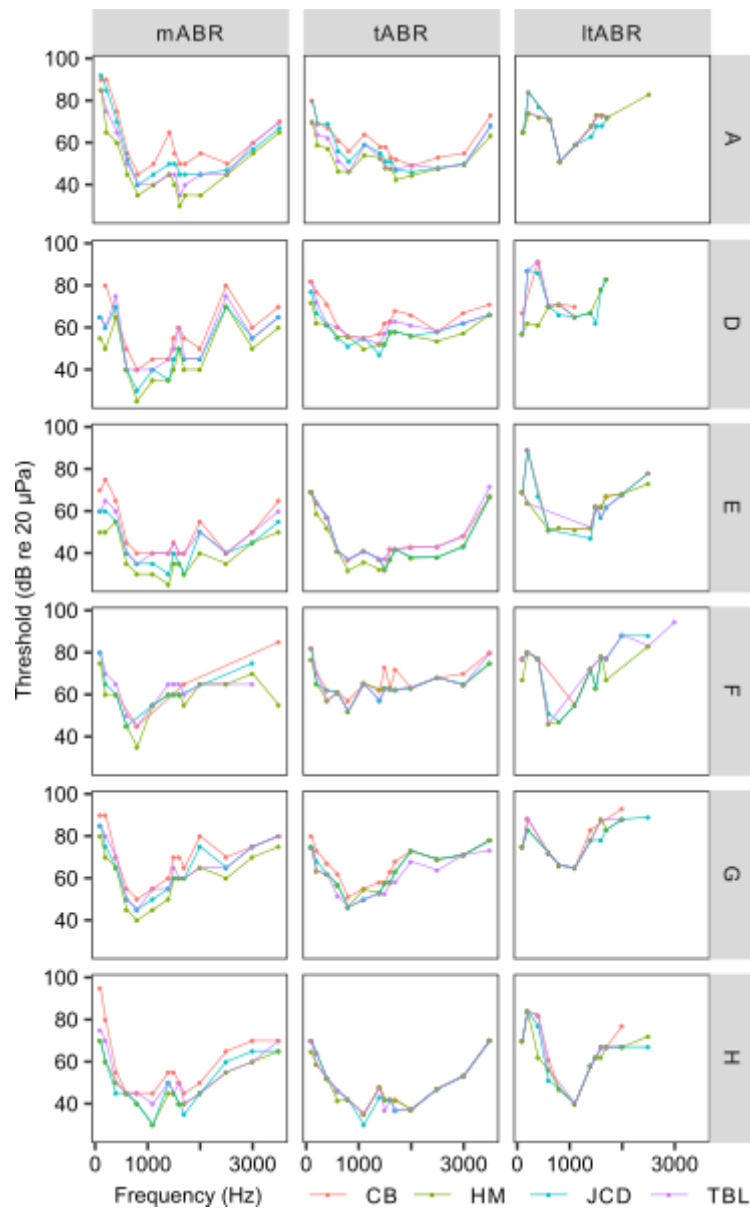

Fig. S2: **Subjectively determined audiograms for the three ABR methods in individuals A and D to H.** Colors represent different researchers.
